# Supplementary material
Source: HighWire-hosted journal article supplement (https://www.cmajopen.ca/highwire/filestream/90504/field_highwire_adjunct_files/2/open-2022-0225-original-submission.pdf)
Supplement: open-2022-0225-original-submission.pdf [file open-2022-0225-original-submission.pdf]

## Scoping review protocol: mapping gender and sexual minority representation in cancer research

Morgan Stirling, Mikayla Hunter, Claire Ludwig, Janice Ristock, Lyndsay Harrison, Amanda Ross-White, Nathan Nickel; Annette Schultz, Versha Banerji, and Alyson Mahar on behalf of the MEGAN-CAN team

MEGAN-CAN Team:

Natalie Coburn, Sunnybrook Health Sciences Centre

Jeff Crane, Memorial University of Newfoundland

Laura Davis, McGill University

David Dawe, CancerCare Manitoba

Kathleen Decker, University of Manitoba

Julie Deleemans, University of Calgary

Marshall Pitz, University of Manitoba

Donna Turner, University of Manitoba

Allison Wiens, CancerCare Manitoba

### Authors:

Morgan Stirling, MSc, University of Manitoba Faculty of Health Sciences, Community Health Sciences, Winnipeg, MB, CAN, R3E 0W2; Mikayla Hunter, BA, University of Manitoba Faculty of Health Sciences, Community Health Sciences, Winnipeg, MB, CAN, R3E 0W2;

Claire Ludwig, PhD(c), The Ottawa Hospital, The University Ottawa, Ottawa, ON, CAN, K1H 8L6;

Janice Ristock, PhD, University of Manitoba, Women's and Gender Studies Program, Winnipeg, MB, CAN, R3T 2N2;

Lyndsay Harrison, MSc, Bruyère Research Institute, Palliative Care Division, Ottawa, ON, CAN, K1N 5C8;

Amanda Ross-White, MLIS, Queen's University, ON, CAN, K7L 3N6;

Nathan Nickel, PhD, University of Manitoba, Manitoba Centre for Health Policy, Community Health Sciences, Winnipeg, MB, CAN R3E 3P5;

Annette Schultz, PhD, University of Manitoba Faculty of Health Sciences, College of Nursing, Winnipeg, MB, CAN R2H 2A6;

Versha Banerji, MD, University of Manitoba Max Rady College of Medicine, Internal Medicine, Winnipeg, MB, CAN and CancerCare Manitoba, Winnipeg, MB, CAN;

Alyson Mahar, PhD, Queen's University, School of Nursing, Kingston, ON, K7L 3N6, CAN

1  
2  
3 **Corresponding Author:**  
4

5 Alyson Mahar, PhD  
6

7 Queen's University, Cataraqui Building  
8

9 92 Barrie Street Kingston, Ontario K7L 3N6, Canada  
10

11 Email: [alyson.mahar@queensu.ca](mailto:alyson.mahar@queensu.ca)  
12  
13

14 **Funding:** This project was funded by the Canadian Cancer Society Emerging Scholar Award for  
15 MEGAN-CAN (Mahar; Grant #707149), and a Canadian Institutes of Health Research Canada  
16 Graduate Scholarship Doctoral Award (Stirling, Grant # 175933). The funders had no role in  
17 developing the protocol.  
18  
19  
20  
21  
22  
23  
24  
25  
26  
27  
28  
29  
30  
31  
32  
33  
34  
35  
36  
37  
38  
39  
40  
41  
42  
43  
44  
45  
46  
47  
48  
49  
50  
51  
52  
53  
54  
55  
56  
57  
58  
59  
60

Confidential

## Abstract

### *Background*

Gender and sexual minorities (GSM) are at high risk of experiencing inequities throughout the cancer continuum due to heterocissexism in the cancer system. Alongside this risk is a lack of evidence describing these inequities and factors influencing them. This review will address this gap by mapping the literature on cancer outcomes among GSM adults and the factors that influence them along cancer continuum.

### *Methods*

This mixed methods scoping review will follow the approach outlined by the Joanna Briggs Institute. We will systematically search electronic databases for literature in collaboration with a health sciences librarian. Two reviewers will screen titles and abstracts to determine eligibility based on inclusion criteria, followed by retrieval of full text articles for data extraction. Results will be reported following the PRISMA extension for scoping reviews (PRISMA-ScR). Quantitative data will be qualitized through a narrative interpretation and pooled with qualitative data into themes.

### *Interpretation*

This review will direct future research efforts by expanding the wider body of research examining cancer disparities, identifying literature gaps and limitations and highlight relevant social determinants of health that influence cancer outcomes for GSM adults.

## Background

Gender and sexual minorities (GSM) are at high risk of experiencing inequities, defined as unfair, unacceptable and avoidable differences in health resulting from unequal distribution of power, prestige and resources across groups,<sup>1,2</sup> throughout the cancer continuum.<sup>3-5</sup> This risk is primarily attributed to the heterocisnormative environment of the health and cancer systems that discriminates against GSM populations and invalidates their experiences. In the cancer care system, heterocisnormativity, is defined as “the assumption that heterosexuality is the standard for defining normal sexual behavior and that male–female differences and gender roles are the natural and immutable essentials in normal human relations”.<sup>6</sup> This manifests in a myriad of ways, including lack of GSM identifiers in cancer registries,<sup>7-9</sup> exclusion of GSM from organized cancer screening programs,<sup>10</sup> lack of culturally appropriate care,<sup>7,11</sup> as well as GSM with cancer experiencing homo/transphobia and discrimination from cancer care providers.<sup>7,11,12</sup> The implications of heterocisnormativity are profound and observed in the cancer-related inequities GSM populations experience, such as lower screening rates,<sup>13-15</sup> higher incidences of viral-related cancers (i.e. HPV)<sup>3,16</sup>, and receipt of culturally inappropriate and unsafe care.<sup>12,17,18</sup>

Addressing these inequities necessitates an evidence base to guide this work. Unfortunately, the research in this area is sparse.<sup>3,8,14</sup> Narrative reviews have described low screening rates, insufficient screening recommendations<sup>8,14</sup> and a dearth of demographic information collection on gender identity and sexual orientation and evidence-based cancer-related clinical guidelines.<sup>3,8</sup> Recognizing patients’ gender identity and sexual orientation allows providers to develop a holistic view of the patient, their condition, and to inform an appropriate treatment plan.<sup>14</sup> Conversely, patients who experience inappropriate care and discrimination by providers may withdraw from care, leading to worse outcomes.<sup>14</sup> Psychosocial support has been widely cited as integral throughout all phases of the cancer continuum.<sup>3</sup> However, there is a lack of GSM-specific support, and GSM patients routinely report feeling unwelcome in general cancer support groups,<sup>3,11</sup> limiting their access to support services.

The failure to collect demographic information results in a lack of knowledge and understanding about GSM’s cancer experiences and outcomes.<sup>3,8,14</sup> The incorporation of more robust demographic collection must be combined with culturally appropriate and informed care by oncology nurses<sup>3</sup> and physicians<sup>3,8</sup> to meaningfully improve the cancer care experience for GSM patients. Although there is some evidence capturing important aspects of the GSM cancer care continuum, there have been no structured literature reviews synthesizing and mapping GSM cancer outcomes and experiences. This proposed review will fill this gap by providing a comprehensive and rigorous description of the range of GSM cancer outcomes and experiences.

Broadly, GSM is an umbrella term used to refer to those individuals who identify as gender and sexual minorities. Gender refers to socially constructed roles, behaviours, and identities of women, men, and gender minority people.<sup>19</sup> Gender minorities are individuals whose gender identity and/or expression does not align with the sex they were assigned at birth. Gender minorities include but are not limited to transgender and non-binary people. Sexual orientation is a complex identity that encompasses identity, attraction, and behaviour.<sup>6</sup> Sexual minorities are individuals whose sexual orientation are not heterosexual or straight, and include but are not

1  
2  
3 limited to lesbian, gay, bisexual, and queer people. While not all studies refer to GSM explicitly,  
4 the use of GSM in this study is a deliberate choice to be inclusive of the various sexual,  
5 romantic, and gender identities, and acknowledges the intersections between these identities.  
6

7  
8 Understanding the complexity of terminology and identities of GSM is critical to addressing  
9 cancer-related inequities they experience. Within the GSM community, there is a wide variety of  
10 intersecting identities that result in an equally as wide array of cancer-related experiences. The  
11 research highlights closing the equity gap will require improving data collections methods,  
12 developing inclusive screening and treatment protocols, as well as increasing access to culturally  
13 competent and safe clinical and psychosocial care.  
14

15  
16 This review seeks to address the absence of equity and provide an overview of the literature on  
17 cancer outcomes among gender and sexual minority adults and the factors that influence them  
18 over the cancer continuum, from risk and prevention to end-of-life/survivorship. The primary  
19 objectives of this scoping review are to systematically map and examine the evidence base  
20 comparing cancer outcomes for GSM adults to others, and to explore the literature describing  
21 cancer care experiences for this population. It will focus primarily on cancer risk, screening,  
22 stage at diagnosis, treatment, and survival, centering on patient perspectives as opposed to  
23 clinicians. Our goals are to direct future research efforts by identifying literature gaps and  
24 limitations and highlight relevant social determinants of health influence cancer outcomes for  
25 GSM adults.  
26  
27

## 28 **Methods & Analysis**

### 29 *About the team*

30  
31  
32 Central to this study's goal of mapping and describing GSM's cancer-related experiences and  
33 outcomes is an analysis of their relationship to power and oppression. It also requires an  
34 acknowledgement that members of this research team, through their own experiences and  
35 relationship to oppression and privilege, may influence the research process. This reflexivity  
36 about our own positionality increases this study's transparency and credibility.<sup>20</sup>  
37  
38

39  
40 We are a diverse group of researchers with different backgrounds and experiences. Among this  
41 team are epidemiologists, clinician-scientists, health services researchers, critical scholars,  
42 nurses, and trainees. Some members of the team identify as part of the GSM population, and  
43 some identify as allies. As a team and as individuals, we are committed to doing research that  
44 can facilitate systemic change to address inequities GSM and other underserved populations  
45 experience in the cancer system.  
46

47  
48 The primary objective of this mixed methods scoping review is to describe the evidence base  
49 related to outcomes and experiences of GSM with cancer.<sup>21</sup> A mixed methods approach is useful  
50 for providing a comprehensive and holistic understanding of an issue by integrating qualitative  
51 and quantitative results.<sup>22</sup> It differs from single method reviews, or reviews that present  
52 quantitative and qualitative data separately, as its emphasis is on integrating results'.<sup>22</sup> Given  
53 the breadth of this study's focus and its overall purpose, a scoping review is an appropriate  
54 method. The scoping review will follow a framework that has been adapted from Arksey and  
55  
56  
57  
58  
59  
60

1  
2  
3 O'Malley, Levac et al., Colquhoun et al. and Peters et al.<sup>23-26</sup> As we anticipate a variety of  
4 qualitative and quantitative study designs to be included in the review, we will use a mixed  
5 methods scoping review approach that is adapted from the Joanna Briggs Institute guide for  
6 Mixed Methods Systematic Reviews and Meta-Analyses. This protocol was developed  
7 following recent guidance from Peters et al.,<sup>27</sup> and adheres to the Preferred Reporting Items for  
8 Systematic Reviews and Meta-Analyses extension for Scoping Reviews checklist and  
9 explanation.<sup>28</sup>  
10  
11

### 12 *Review Question and Objectives*

14 In describing this evidence base, this scoping review will respond to a broad question of how  
15 cancer affects GSM populations. To do so, this review will accomplish the following objectives:  
16

- 17 1) Outline the ways GSM are described in cancer research.
- 18 2) Describe how GSM cancer outcomes and experiences are investigated.
- 19 3) Map the impact of being a GSM on adult cancer risk, screening, stage at diagnosis,  
20 treatment, and survival relative to those who are not a sexual and/or gender minority.
- 21 4) Describe how intersectionality, oppression and social determinants of health are  
22 attributed to GSM minorities cancer outcomes and experiences.  
23  
24  
25

### 26 *Search Strategy & information sources*

27 The primary search strategy was developed for Medline by the research team in collaboration  
28 with a librarian. An example is provided in the Supplementary material. We will execute a  
29 similar search in Embase, Cochrane, CINAHL, Scopus and PsychInfo. In addition to these  
30 electronic databases, we will search for grey literature in the OpenGrey database as well as  
31 review reference list of included studies to identify additional relevant publications. Search terms  
32 will use MeSH headings for cancer and GSM. We will use Boolean operator OR within a  
33 category and using Boolean operator AND between cancer and sexual and gender minorities:  
34  
35  
36

- 37 • Cancer: [exp neoplasms/]
- 38 • Sexual and Gender Minorities: [exp "sexual and gender minority"/]; [exp named groups  
39 by sexuality/]  
40

### 41 *Evidence screening and selection*

42 Following the search, all identified citations will be uploaded into Covidence and duplicates  
43 removed. Two reviewers will screen titles and abstracts to determine eligibility based on  
44 inclusion criteria. Studies that potentially meet inclusion criteria will be retrieved in full. Two  
45 reviewers will assess the full text in detail to determine eligibility. Disagreements will be  
46 resolved through discussion or with a third reviewer. We will report the study selection process  
47 using the Preferred Reporting Items for Systematic Reviews and Meta-Analyses (PRISMA) flow  
48 diagram. Table 1 outlines inclusion and exclusion criteria following the population, concept,  
49 context categories for scoping reviews.<sup>26</sup> Studies published in 2010 and later will be included.  
50 This date was selected as there is clear increase in GSM health studies published during this time  
51 period.<sup>29</sup>  
52  
53  
54  
55  
56  
57  
58  
59  
60

**Table 1: Inclusion and Exclusion Criteria**

|            | <b>Inclusion Criteria</b>                                                                                                                                                        | <b>Exclusion Criteria</b>                                                                                                                                                                                                                                                                                                                                   |
|------------|----------------------------------------------------------------------------------------------------------------------------------------------------------------------------------|-------------------------------------------------------------------------------------------------------------------------------------------------------------------------------------------------------------------------------------------------------------------------------------------------------------------------------------------------------------|
| Population | Sexual and/or gender minority adults (age $\geq$ 18)<br>Family members<br>Chosen family<br>Caregivers                                                                            | Studies where the outcomes of sexual and/or gender minority people cannot be distinguished from other samples (i.e. non-sexual/gender minority persons; study describes the prevalence of sexual and/or gender minorities in the study population but does not stratify results)<br><br>Studies where primary sample is comprised of health care providers. |
| Concept    | Studies describing outcomes or experiences along cancer continuum: risk, screening, diagnosis, treatment, survivorship<br><br>Studies investigating impact of HRT on cancer risk | Studies where cancer isn't primary disease or cancer outcomes are not separately reported<br><br>Studies exploring relationship between pathology and/or etiology of cancer with sexual orientation or gender identity<br><br>Non-human lab studies                                                                                                         |
| Context    | Grey literature<br>Original research articles (quantitative, qualitative, mixed methods)<br>Papers published after 2010<br>Case reports<br>All settings considered               | Opinion/Commentary papers<br>Editorials<br>Conference abstracts<br>Systematic reviews, meta-analyses, network meta-analyses, narrative reviews, critical reviews, qualitative reviews<br>Summary report<br>Pre-prints<br>Archival studies                                                                                                                   |

*Data extraction*

A data chart for both quantitative and qualitative studies will be developed through consultation with the research team. There will be overlap in type of data extracted from quantitative studies, qualitative studies, and mixed methods studies. Quantitative results of mixed methods studies will be extracted alongside quantitative studies. Qualitative results of mixed methods studies will be extracted alongside qualitative studies. Data extracted will include descriptions of publications details, study populations (e.g. age, sex and gender, socioeconomic status, sexual orientation), phase of cancer continuum explored in the study, sources of information and data collections methods (e.g. hospital records, cancer registry, survey, interview), study design and methods, sample size, outcome measures, and results. We will also record whether GSM populations were included/consulted during the study. The data charts will be piloted by two

1  
2  
3 reviewers. Differences will be resolved through discussion or a third reviewer. Results from the  
4 pilot will be shared with the research team to determine whether the charts capture information  
5 in a way that satisfactorily responds to the research questions. Revisions will be incorporated as  
6 necessary.  
7

## 8 **Data Analysis**

### 9 *Data synthesis and integration*

10  
11  
12 A key feature of a mixed methods scoping review is integrating qualitative and quantitative  
13 results to provide a comprehensive overview of the phenomenon being investigated.<sup>22</sup> This  
14 review will follow a convergent integrated approach to synthesis and integration, which is  
15 suitable when investigating questions that can be answered qualitatively and quantitatively. This  
16 approach involves synthesizing qualitative and quantitative data simultaneously. Following this  
17 approach requires transforming data so they are in a mutually compatible format. For this review  
18 we will qualitize quantitative data which requires developing a narrative interpretation of the  
19 quantitative data. This approach is recommended rather than quantitizing qualitative data as it  
20 is less error-prone than attributing numerical values to qualitative data.<sup>22</sup> Once qualitizing is  
21 complete, data will then be pooled with qualitative data through iterative and detailed  
22 examination to identify categories based on similarities. Categories will then be aggregated to  
23 produce integrated findings. Through integrating data, a mixed methods scoping review allows  
24 for investigating whether qualitative and quantitative data in complementary or divergent,  
25 identify gaps, and to describe contradictory findings.<sup>22</sup>  
26  
27  
28  
29

### 30 *Presentation of results*

31  
32 Descriptive statistics and counts will be used to report study characteristics such as type of study,  
33 point(s) along the continuum investigated, outcomes and experiences investigated, measures of  
34 sex and gender used, and factors contributing to outcomes and experiences. We will present on  
35 different definitions of GSM across studies and highlight gaps in types of research completed.  
36 Intersectionality of characteristics and identities influencing outcomes and experiences will be  
37 presented within a nested ecological framework.<sup>30</sup> Results will be synthesized point by point  
38 along the cancer continuum to create an understanding of the depth and scope of the research on  
39 this topic. Integrated results will be presented visually in a table and in narrative form.  
40  
41  
42

### 43 *Consultation*

44  
45 Consultation will be an integral element of this review and similar to the process of completing a  
46 scoping review, will be iterative in nature. Throughout the various steps described earlier, we  
47 will engage GSM, community organizations, and knowledge users. This will enable us to ensure  
48 the scoping review aligns with research priorities of this community as well as identify suitable  
49 approaches for disseminating results and additional knowledge translation activities. This work  
50 will be guided by recommendations from JBI's Scoping Review Methodology Group.<sup>31</sup>  
51  
52

### 53 *Patient and public involvement*



1  
2  
3 The research team includes patient and public advisors. They have been involved in the  
4 protocol's development and will be involved throughout the review.  
5

### 6 **Interpretation**

7  
8 This protocol outlines a rigorous method to map literature on cancer outcomes and experiences  
9 for gender and sexual minorities. By applying a novel mixed methods approach to literature  
10 synthesis, we will comprehensively explore this topic in a systematic way. The results will map  
11 how gender and sexual minorities are represented in cancer research as well as how differing  
12 definitions may contribute to heterogeneity in research findings or gaps in the evidence-base.  
13  
14

### 15 *Limitations*

16  
17 The scoping review research questions are broad and address the entire cancer continuum from  
18 risk to end-of-life care. As such, it may not be feasible to combine results across study outcomes  
19 if the methodologies are too heterogeneous. In that case, we will report the findings separately  
20 for each point along the cancer continuum. Cancer care experiences within the GSM population  
21 are diverse as a result of individual and intersecting identities and therefore it may not be  
22 possible to draw conclusions on the entire community. Careful attention will be paid to ensuring  
23 that results are reported within an intersectional context and a person-centered approach. Finally,  
24 while we aim to identify all relevant papers, the ever-evolving language within and surrounding  
25 the GSM community may mean it is not possible to adequately capture the most contemporary  
26 evidence base. For example, not all terminology used in the GSM community is attached to  
27 search terms in academic databases.  
28  
29  
30

### 31 *Conclusion*

32  
33 This scoping review has the potential to highlight gaps and limitations in the existing body of  
34 literature, and in doing so, provide direction for future cancer control priorities and providing  
35 safe and inclusive cancer care for the GSM community.  
36  
37  
38  
39  
40  
41  
42  
43  
44  
45  
46  
47  
48  
49  
50  
51  
52  
53  
54  
55  
56  
57  
58  
59  
60

## References

1. Marmot M, Friel S, Bell R, Houweling TAJ, Taylor S. Closing the gap in a generation: health equity through action on the social determinants of health. *The Lancet*. 2008;372:1661-9.
2. Nelson A. Unequal treatment: confronting racial and ethnic disparities in health care. *J Natl Med Assoc*. 2002;94:666-8.
3. Quinn GP, Sanchez JA, Sutton SK, et al. Cancer and lesbian, gay, bisexual, transgender/transsexual, and queer/questioning (LGBTQ) populations. *CA Cancer J Clin*. 2015;65:384-400.
4. Damaskos P, Amaya B, Gordon R, Walters CB. Intersectionality and the LGBT Cancer Patient. *Semin Oncol Nurs*. 2018;34:30-6.
5. Boehmer U. LGBT Populations' Barriers to Cancer Care. *Seminars in Oncology Nursing*. 2018;34:21-9.
6. American Psychological Association. APA dictionary of psychology (2nd ed.). 2015; <https://dictionary.apa.org/>. Accessed 06-21, 2022.
7. Kamen CS, Alpert A, Margolies L, et al. "Treat us with dignity": a qualitative study of the experiences and recommendations of lesbian, gay, bisexual, transgender, and queer (LGBTQ) patients with cancer. *Support Care Cancer*. 2019;27:2525-32.
8. Cathcart-Rake EJ. Cancer in Sexual and Gender Minority Patients: Are We Addressing Their Needs? *Curr Oncol Rep*. 2018;20:85.
9. Guyan K. Beyond borders: Queer data around the world. *Queer Data : Using Gender, Sex and Sexuality Data for Action*. 1 ed. London: Bloomsbury Academic; 2022:87-110.
10. Berner AM. Improving understanding of cancer in the gender diverse population. *Nat Rev Cancer*. 2021;21:537-8.
11. Bryson MK, Taylor ET, Boschman L, et al. Awkward Choreographies from Cancer's Margins: Incommensurabilities of Biographical and Biomedical Knowledge in Sexual and/or Gender Minority Cancer Patients' Treatment. *J Med Humanit*. 2020;41:341-61.
12. Taylor ET, Bryson MK. Cancer's Margins: Trans\* and Gender Nonconforming People's Access to Knowledge, Experiences of Cancer Health, and Decision-Making. *LGBT Health*. 2016;3:79-89.
13. Peitzmeier SM, Khullar K, Reisner SL, Potter J. Pap test use is lower among female-to-male patients than non-transgender women. *Am J Prev Med*. 2014;47:808-12.
14. Ceres M, Quinn GP, Loscalzo M, Rice D. Cancer Screening Considerations and Cancer Screening Uptake for Lesbian, Gay, Bisexual, and Transgender Persons. *Semin Oncol Nurs*. 2018;34:37-51.
15. Haviland KS, Swette S, Kelechi T, Mueller M. Barriers and Facilitators to Cancer Screening Among LGBTQ Individuals With Cancer. *Oncology nursing forum*. 2020;47:44-55.
16. Jackson SS, Han X, Mao Z, et al. Cancer Stage, Treatment, and Survival Among Transgender Patients in the United States. *JNCI: Journal of the National Cancer Institute*. 2021;113:1221-7.
17. Burns ZT, Bitterman DS, Perni S, et al. Clinical Characteristics, Experiences, and Outcomes of Transgender Patients With Cancer. *JAMA Oncology*. 2021;7:e205671-e.
18. Schefter A, Thomaier L, Jewett P, et al. Cross-sectional study of psychosocial well-being among lesbian, gay, bisexual, and heterosexual gynecologic cancer survivors. *Cancer Rep (Hoboken)*. 2022;5:e1461.

19. Canadian Institute of Health Research. What is gender? What is sex? 2020; <https://cihr-irsc.gc.ca/e/48642.html#d2>. Accessed May 12, 2022.
20. Finlay L. "Outing" the Researcher: The Provenance, Process, and Practice of Reflexivity. *Qualitative Health Research*. 2002;12:531-45.
21. Stern C, Lizarondo L, Carrier J, et al. Methodological guidance for the conduct of mixed methods systematic reviews. *JBIM Evid Synth*. 2020;18:2108-18.
22. Stern C, Lizarondo L, Carrier J, et al. Methodological guidance for the conduct of mixed methods systematic reviews. *JBIM Evidence Synthesis*. 2020;18.
23. Arksey H, O'Malley L. Scoping studies: towards a methodological framework. *International Journal of Social Research Methodology*. 2005;8:19-32.
24. Colquhoun HL, Levac D, O'Brien KK, et al. Scoping reviews: time for clarity in definition, methods, and reporting. *J Clin Epidemiol*. 2014;67:1291-4.
25. Levac D, Colquhoun H, O'Brien KK. Scoping studies: advancing the methodology. *Implementation Science*. 2010;5:69.
26. Peters MDJ, Godfrey CM, Khalil H, McInerney P, Parker D, Soares CB. Guidance for conducting systematic scoping reviews. *JBIM Evidence Implementation*. 2015;13.
27. Peters MDJ, Godfrey C, McInerney P, et al. Best practice guidance and reporting items for the development of scoping review protocols. *JBIM Evidence Synthesis*. 2022;20.
28. Tricco AC, Lillie E, Zarin W, et al. PRISMA Extension for Scoping Reviews (PRISMA-ScR): Checklist and Explanation. *Ann Intern Med*. 2018;169:467-73.
29. National Library of Medicine. Search results for LGBT health. <https://pubmed.ncbi.nlm.nih.gov/?term=LGBT+health&filter=years.2011-2022&sort=pubdate>. Accessed 06-17, 2022.
30. Trickett EJ, Beehler S. The Ecology of Multilevel Interventions to Reduce Social Inequalities in Health. *American Behavioral Scientist*. 2013;57:1227-46.
31. Pollock D, Alexander L, Munn Z, et al. Moving from consultation to co-creation with knowledge users in scoping reviews: guidance from the JBI Scoping Review Methodology Group. *JBIM Evidence Synthesis*. 2022;20.

1  
2  
3  
4  
5  
6  
7  
8  
9  
10  
11  
12  
13  
14  
15  
16  
17  
18  
19  
20  
21  
22  
23  
24  
25  
26  
27  
28  
29  
30  
31  
32  
33  
34  
35  
36  
37  
38  
39  
40  
41  
42  
43  
44  
45  
46  
47  
48  
49  
50  
51  
52  
53  
54  
55  
56  
57  
58  
59  
60

Database: Ovid MEDLINE(R) and Epub Ahead of Print, In-Process, In-Data-Review & Other Non-Indexed Citations, Daily and Versions

1 exp Transgender Persons/  
2 exp Transsexualism/  
3 exp Sex Reassignment Procedures/  
4 transgender\*.tw.  
5 transsexual\*.tw.  
6 ("trans m#n" or "trans wom#n" or "trans person\*" or transpeople or "trans male\*" or "trans female\*").tw.  
7 ((gender adj3 (non-binary or agender or fluid\* or trans\* or non-conform\* or nonconform\*)) or gender-nonconform\*).tw.  
8 gender dysphori\*.tw.  
9 (sex reassignment\* or gender reassignment\* or gender affirm\*).tw.  
10 (transfeminine or transmasculine).tw.  
11 (AFAB or AMAB).tw.  
12 (gender adj (expression\* or transition\*)).tw.  
13 (transvestite\* or transvestism).tw.  
14 ("gender\* identit\*" or "gender\* inclusi\*" or "gender\* nonconform\*" or "gender non-conform\*" or "gender\* divers\*" or "gender\* express\*" or "gender\* neutral\*" or "gender\* norm\*" or "gender\* fluid\*" or "gender\* dyphoria" or agender\* or bigender\* or genderqueer\* or cisnormativ\* or misgender\*).mp.  
15 exp "Sexual and Gender Minorities"/  
16 bisexuality/ or exp homosexuality/ or transsexualism/  
17 gay.ab,ti,kw.  
18 homosexual\*.ab,ti,kw.  
19 lesbian\*.ab,ti,kw.  
20 bisexual\*.ab,ti,kw.  
21 "men who have sex with men".mp.  
22 transgender\*.ab,ti,kw.  
23 queer\*.ab,ti,kw.  
24 "gender identit\*".mp.  
25 "sexual minorit\*".mp.  
26 "sexual identit\*".mp.  
27 LGBT\*.mp.  
28 transexual\*.mp.  
29 transsexual\*.mp.  
30 trans-sexual\*.mp.  
31 LGB.ab,ti,kw.  
32 "same sex marriage\*".mp.  
33 "gender dysphoria\*".mp.  
34 "same sex couple\*".mp.  
35 (non-heterosexual\* or nonheterosexual\*).mp.  
6 "same sex relationship\*".mp.  
37 (trans adj2 (people or person\* or female or woman or women or male or man or men)).mp.  
38 "same sex parent\*".mp.  
39 "gender reassignment\*".mp.  
40 ((nonbinary or non-binary) adj2 (gender or person\* or people or patient\*)).mp.  
41 "gender transition\*".mp.  
42 ("gender queer" or genderqueer).mp.

- 1  
2  
3 43 GLBT.mp.  
4 44 "same sex attract\*".mp.  
5 45 "women who have sex with women".mp.  
6 46 "gender transformation\*".mp.  
7 47 homophile\*.mp.  
8 48 "gender and sexual diversit\*".mp.  
9 49 sex transformation\*.mp.  
10 50 sexual dissident\*.mp.  
11 51 "same gender loving".mp.  
12 52 GLBQ.mp.  
13 53 heteroflexible.mp.  
14 54 lesbian.mp.  
15 55 "women loving women".mp.  
16 56 bicurious.mp.  
17 57 exp Neoplasms/  
18 58 (neoplasm\* or cancer\* or leukemia or leukaemia or malignan\* or carcinoma or tumor\* or  
19 tumour\*).ab,ti,kw.  
20 59 or/1-56  
21 60 or/57-58  
22 61 59 and 60  
23  
24  
25  
26  
27  
28  
29  
30  
31  
32  
33  
34  
35  
36  
37  
38  
39  
40  
41  
42  
43  
44  
45  
46  
47  
48  
49  
50  
51  
52  
53  
54  
55  
56  
57  
58  
59  
60

Confidential
